# Supplementary material for: Strain-induced topological transition from planar to filamentous grain boundary oxidation in austenitic stainless steel
Source: Research Square preprint supplement (doi:10.21203/rs.3.rs-8673645/v1), 2026-02-05
Supplement: Supplementary file 1 [file bbab5c3dcc6f8e495e70956c.docx]

Strain-induced topological transition from planar to filamentous grain boundary oxidation in austenitic stainless steel

Semanti Mukhopadhyay1, Tingkun Liu1, Matthew J. Olszta1, Hyoju Park1, Ziqing Zhai1, Mychailo Toloczko1, Arun Devaraj1*

1Pacific Northwest National Laboratory, Richland, WA 99352

Supplementary Images


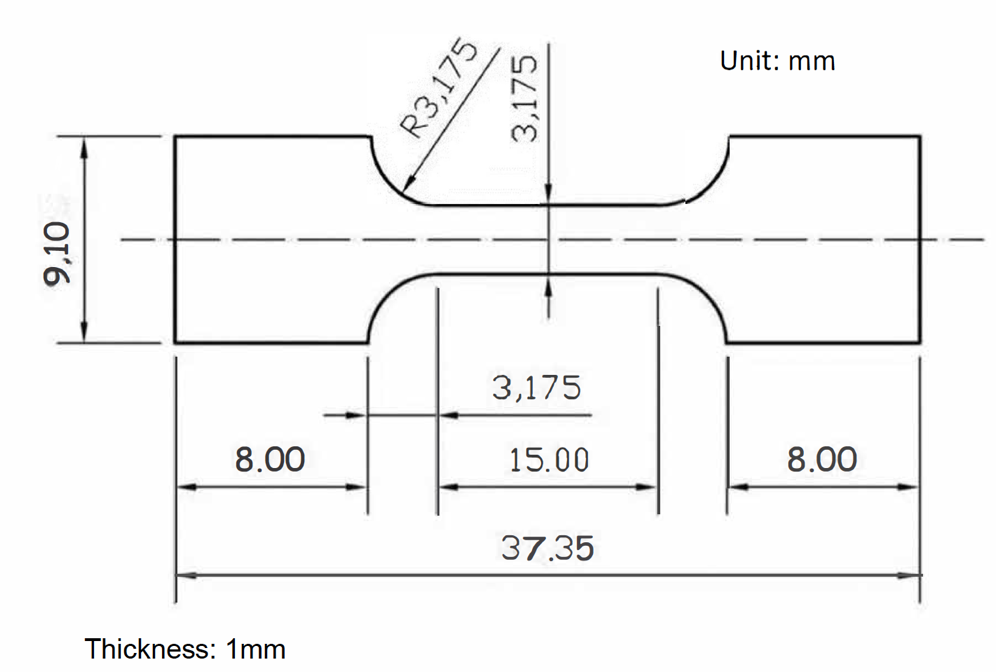


Figure S1: Geometry of the dogbone used for room temperature uniaxial tensile testing. Units in mm.


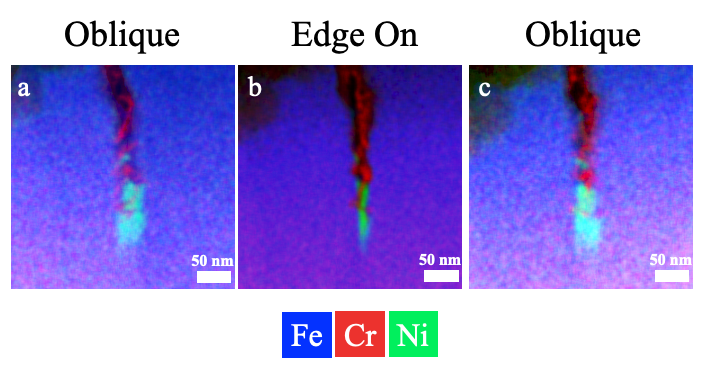


Figure S2: Tilt-series STEM-EDS analysis of a third CTS RHAGB (D-3) showing Cr-enriched filamentary oxide interpenetrating the RHAGB with a Ni-enriched DIGM zone


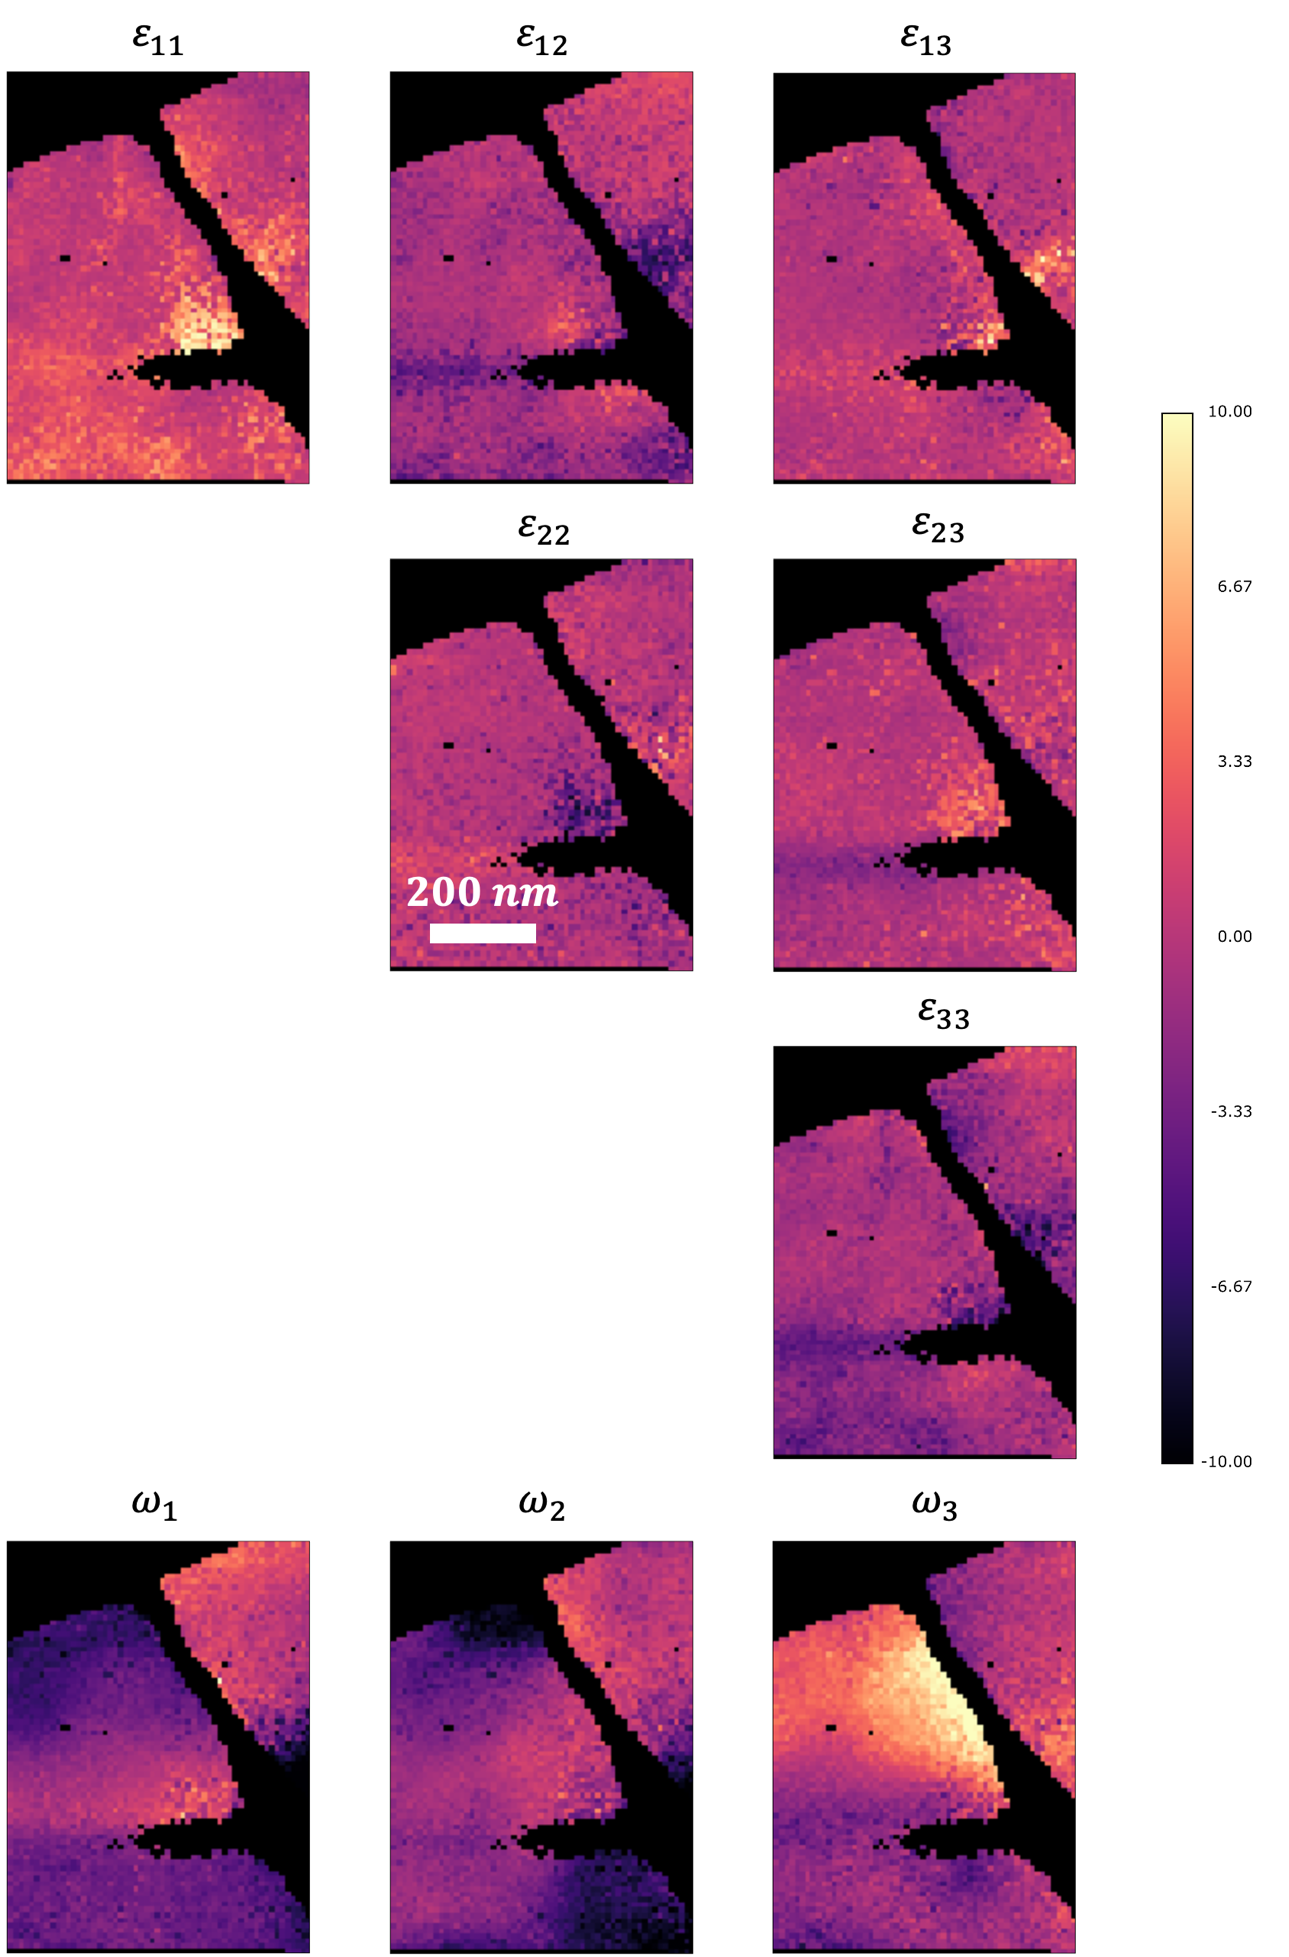


Figure S3: Relative deviatoric strain maps (mm/m) and rotation maps obtained for CTS RHAGB D-1


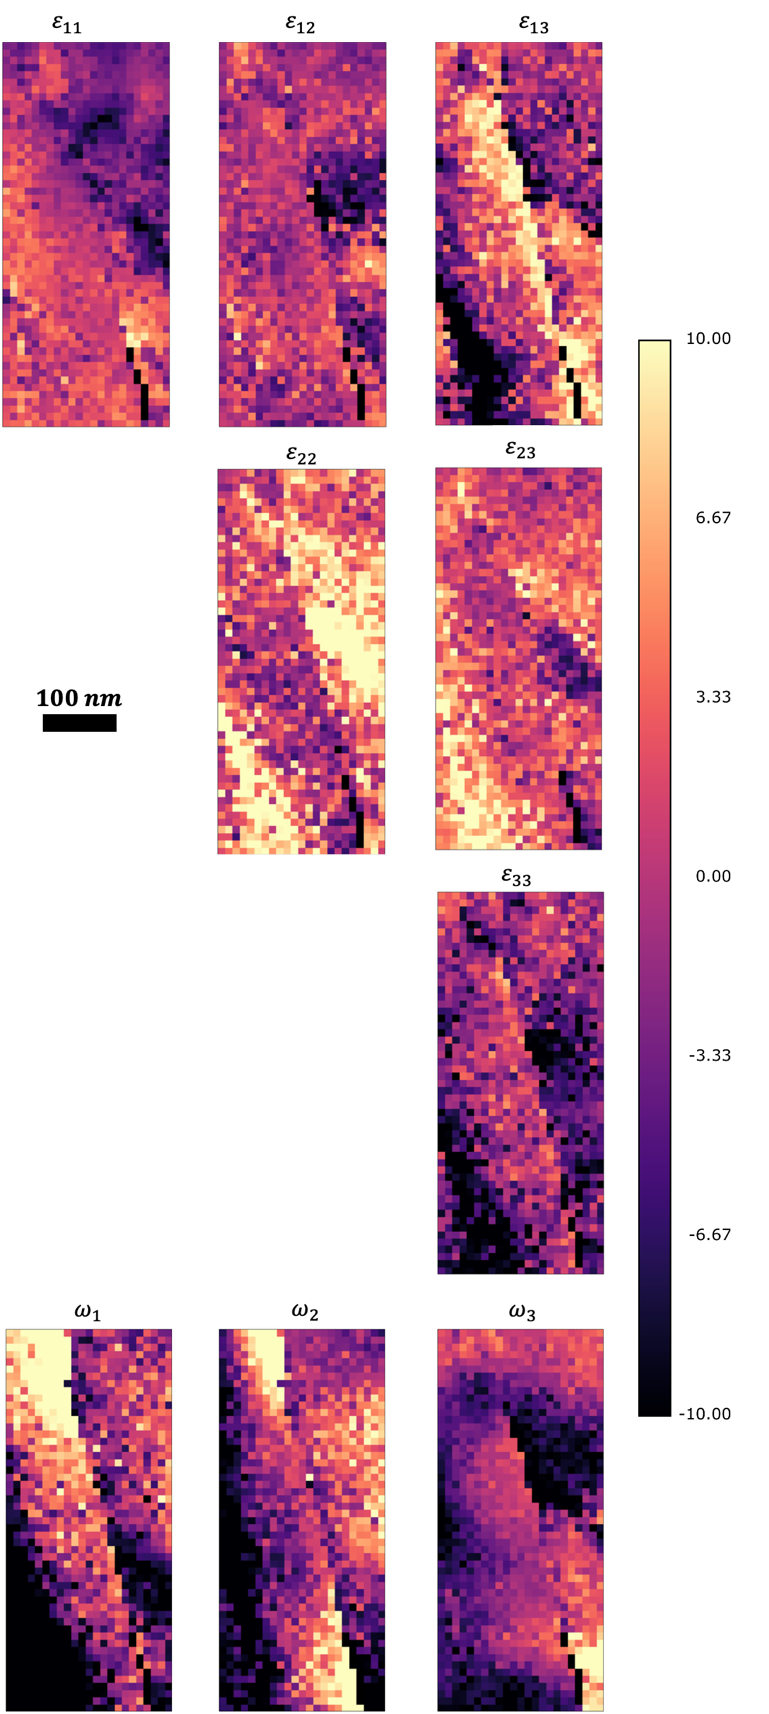


Figure S4: Relative deviatoric strain maps (mm/m) and rotation maps obtained for CTS RHAGB D-2
